# Supplementary material
Source: PubMed Central journal article supplement (PMC7895323)
Supplement: NIHMS1603595-supplement-Supplementary_information.pdf [file NIHMS1603595-supplement-Supplementary_information.pdf]

## P protein

```
EZ vaccine      1 MAEEQARHVKNGL ECI RALKAEP IGSLAIEEAMAAWSEI 39
Bilthoven WT   1 -----Q----- 1

40 SDNPGQERATCREEKAGSSGLSKPCLSAIGSTEGGAPRI 78
2 -----A-K-----S----- 4

79 RGQGPGESDDDAETLGIPPRNLQASSTGLQCYVVDHSG 117
5 ----S-----SG----- 7

118 EAVKGIQDADSIMVQSGLDGDDSTLSGGDNESENSDVDIG 156
-----

157 EPDTEGYAITDRGSAPISMGFRA SDVETAEGGEIHELLR 195
-----

196 LQSRGNFPKLGKTLNVPPPPDPGRASTSGTPIKKGTDA 234
8 -----R-----L--L-----E----- 11

235 RLASFGTEIASLLTGATQCARKSPSEPSGPGAPAGNVP 273
-----

274 ECVSNAALIQEWTPESGTTISPRSQNNEEGGDYYDDELFI 312
12 -----V----- 12

313 SDVQDIKTALAKIHEDNQKIISKLESLLLLKGEVESIKK 351
-----

352 QINRQNI S ISTLEGLHLSIMIAIPGLGKDPNDPTADVEI 390
13 -----F----- 13

391 NPD LKPIIGRDSGRALAEVLKKPVASRQLQGMTNGRTSS 429
14 -----I----- 14

430 RGQLLKEFQLKPIGKKMSSAVGFVPDTGPASRSVIRSI 468
-----

469 KSSRLEEDRKRYLMTLLDDIKGANDLAKFHQMLMKIIMK 507
-----
```

## M Protein

|              |                                                |     |
|--------------|------------------------------------------------|-----|
| EZ vaccine   | 1 MTEIYDFDKSAWDIKGLIAPIQPTTYS DGR LVPQVRVID    | 39  |
| Bilthoven WT | 1 -----S-----                                  | 1   |
|              | 40 PGLGDRKDEC FMYMFL LGVVEDSDP LGPPIGRAF GSLPL | 78  |
|              | -----                                          |     |
|              | 79 GV GKSTAKPEKLLKEATELDIVVRRTAGLNEKLVFYNNT    | 117 |
|              | 2 ---R-----E-----                              | 3   |
|              | 118 PLTLLTPWRKVLTTG SVFNANQVCSAVNLIPLDTPQRFR   | 156 |
|              | 4 -----I-----N-----                            | 5   |
|              | 157 VVYMSITRLSDNGY YTVPRRMLEFRSVNAVA FNLLVTLR  | 195 |
|              | -----                                          |     |
|              | 196 IDK AIGPGKIIDNTEQLPEATFMVHIGNFRRKKSEVYSA   | 234 |
|              | 6 -----H-----A-----                            | 7   |
|              | 235 DYCKMKIEKMGLV FALGGIGG TSLHIRSTGKM SKTLHAQ | 273 |
|              | -----                                          |     |
|              | 274 LGFKKTL CYPLIDINEDLNRL LWR SRCKIVRIQAVLQPS | 312 |
|              | 8 -----M-----V-----                            | 9   |
|              | 313 VPQEFR IYDDVIINDDQGLFKVL                   | 335 |
|              | -----                                          |     |

## F Protein

```
EZ vaccine   1 M S I M G L K V N V S A I F M A V L L T L Q T P T G Q I H W G N L S K I G V V   39
Bilthoven WT -----

40 G I G S A S Y K V M T R S S H Q S L V I K L M P N I T L L N N C T R V E I A E   78
-----

79 Y R R L L R T V L E P I R D A L N A M T Q N I R P V Q S V A S S R R H K R F A   117
1 ----- F ----- 1

118 G V V L A G A A L G V A T A A Q I T A G I A L H Q S M L N S Q A I D N L R A S   156
-----

157 L E T T N Q A I E A I R Q A G Q E M I L A V Q G V Q D Y I N N E L I P S M N Q   195
-----

196 L S C D L I G Q K I G L K L L R Y Y T E I L S L F G P S L R D P I S A E I S I   234
-----

235 Q A L S Y A L G G D I N K V L E K L G Y S G G D L L G I L E S R G I K A R I T   273
-----

274 H V D T E S Y F I V L S I A Y P T L S E I K G V I V H R L E G V S Y N I G S Q   312
-----

313 E W Y T T V P K Y V A T Q G Y L I S N F D E S S C T F M P E G T V C S Q N A L   351
-----

352 Y P M S P L L Q E C L R G S T K S C A R T L V S G S F G N R F I L S Q G N L I   390
-----

391 A N C A S I L C K C Y T T G T I I N Q D P D K I L T Y I A A D H C P V V E V N   429
-----

430 G V T I Q V G S R R Y P D A V Y L H R I D L G P P I S L E R L D V G T N L G N   468
-----

469 A I A K L E D A K E L L E S S D Q I L R S M K G L S S T S I V Y I L I A V C L   507
-----

508 G G L I G I P A L I C C C R G R C N K K G E Q V G M S R P G L K P D L T G T S   546
-----

547 K S Y V R S L                                     553
-----
```

## H Protein

```
EZ vaccine 1 M SPQRDR INAFYKDNPHPKGSR IV INREHLM IDRPHYVLL 39
Bilthoven WT -----

40 AVLFVVMFLSL IGLLA IAG IRLHRAA IYTAE IHKSLSTNL 78
-----

79 DVTNS IEHQVKDVL TPLPK IIGDEVGLRTPQR PTDLVKF 117
-----

118 ISDK IKFLNPDREYDFRD LTWC INPPER IKLDYDQYCAD 156
-----

157 VAAEELMNALVNST LLETRTTNQ FLAVSKGNC SGPTT IR 195
-----

196 GQFSNM SLSLLDLY LGRGYNVSS IVTMT SQGM YGGTYLV 234
1 -----S----- 1

235 EKPNLSSKRSELSQ LSMYRVFVGV IRNPG LGAPVPHMT 273
2 -----G----- 2

274 NYLEQPA SNDLSN CMVALGELK LAA LCHGEDS ITIPYQG 312
3 --F--V-----G----- 5

313 SGKGVSPQ LVKLG VWKSP TDMQSW VPLSTDDPV IDRLYL 351
6 -----F----- 6

352 SSHRGV IADNQAKWAVPTTRTDDKLRM ETCFQQACKGKI 390
7 -----I----- 7

391 QALCENPEWAPLKDNR IPSYGVLSVDLSLTVELK IKIAS 429
8 -----H-----A----- 9

430 GFGPLITHGSGMDLYKSNHNNVYWL TIPP MKNLALGV IN 468
10 -----E----- 10

469 TLEWIPRFKVSPLYLPNVPIKEAGEDCHAPTYPAEVDGD 507
11 -----N--T----- 12

508 VKLSSNLVILPGQDLQYV LATYDTSRVEHAVVYVYSPG 546
-----S 13

547 RSFSYFYPFRLP IKGVP IELQVECFTWDQKLWCRHFCVL 585
14 -----I----- 14

586 ADSESGGHITHSGMVGMGV SCTVTR EDGTNRR 617
15 -----S- 15
```

## L protein

|              |                                                                                   |     |
|--------------|-----------------------------------------------------------------------------------|-----|
| EZ vaccine   | 1 M D S L S V N Q I L Y P E V H L D S P I V T N K I V A I L E Y A R V P H A Y S   | 39  |
| Bilthoven WT | -----                                                                             |     |
|              | 40 L E D P T L C Q N I K H R L K N G P S N Q M I I N N V E V G N V I K S K L R S  | 78  |
|              | 1 ----- I -----                                                                   | 1   |
|              | 79 Y P A H S H I P Y P N C N Q D L F N I E D K E S T R K I R E L L K K G N S L Y  | 117 |
|              | -----                                                                             |     |
|              | 118 S K V S D K V P Q C L R D T N S R L G L G S E L R E D I K E K V I N L G V Y M | 156 |
|              | 2 ----- N ----- T -----                                                           | 3   |
|              | 157 H S S Q W P E P F L P W P T V K T E M R S V I K S Q T H T C H R R R H T P V F | 195 |
|              | -----                                                                             |     |
|              | 196 F T G S S V E L L I S R D L V A I I S K E S Q H V Y Y L T F E L V L M Y C D V | 234 |
|              | -----                                                                             |     |
|              | 235 I E G R L M T E T A M T I D A R Y T E L L G R V R Y M W K L I D G F F P A L G | 273 |
|              | -----                                                                             |     |
|              | 274 N P T Y Q I V A M L E P L S L A Y L Q L R D I T V E L R G A F L N H C P T E I | 312 |
|              | -----                                                                             |     |
|              | 313 H D V L D Q N G F S D E G T Y H E L I E A L D Y I P I T D D I H L T G E I P S | 351 |
|              | 4 ----- Y -----                                                                   | 4   |
|              | 352 F F R S F G H P R L E A V T A A E N V R K Y M N Q P K V I V Y E T L M K G H A | 390 |
|              | -----                                                                             |     |
|              | 391 I F C G I I I N G Y R D R H G G S W P P L T L P L H A A D T I R N A Q A S G E | 429 |
|              | -----                                                                             |     |
|              | 430 G L T H E Q C V D N W K S P A G V K P G C F M P L S L D S D L T M Y L K D K A | 468 |
|              | -----                                                                             |     |
|              | 469 L A A L Q R E W D S V Y P K E F L R Y D P P K G T G S R R L V D V F L N D S S | 507 |
|              | -----                                                                             |     |
|              | 508 F D P Y D V I M Y V V S G A Y L H D P E F N L S Y S L K E K E I K E T G R L F | 546 |
|              | 5 ----- M -----                                                                   | 5   |
|              | 547 A K M T Y K M R A C Q V I A E N L I S N G I G K Y P K D N G M A K D E H D L T | 585 |
|              | -----                                                                             |     |
|              | 586 K A L H T L A V S G V P K D L K E S H R G G P V L K T Y S R S P V H T S T R N | 624 |
|              | 6 ----- N -----                                                                   | 6   |
|              | 625 V R A A K G F I G F P Q V I R Q D Q D T D H P E N M E A Y E T V S A F I T T D | 663 |
|              | 7 ----- I ----- N ----- S -----                                                   | 9   |
|              | 664 L K K Y C L N W R Y E T I S L F A Q R L N E I Y G L P S F F Q W L H K R L E T | 702 |
|              | -----                                                                             |     |
|              | 703 S V L Y V S D P H C P P D L D A H I P L Y K V P N D Q I P I K Y P M G G I E G | 741 |
|              | 10 ----- C -----                                                                  | 10  |

742 YCQKLT IST IPYLYLAAYESGVR IASLVQGDNQT IAVT 780  
-----  
781 KRVPSTWPFYNLKKREAAARVTRDYFV ILRQRLHD IGHHLK 819  
-----  
820 ANETIVSSHFPVYSKG IYYDGLLV SQ SLK S IARCVFWSE 858  
-----  
859 TIVDETRAACSN IATTMAKS IERGYDRYLAYS LNVLKVI 897  
-----  
898 QQ ILISLGFT INSTMTRDVV IP LLTNNDLL IRMALLPAP 936  
11 -----Q----- 11  
937 IGGMNYLNM SRLPVRN IGDPVTSS IADLKRMLASLMPE 975  
-----  
976 ETLHQVMTQQPGDSSFLDWA SDPY SANLVCVQ S ITRLLK 1014  
-----  
1015 NITARFVLIHSPNPM LKGLFHDDSK EDEGLAAPLMDRH 1053  
-----  
1054 IIVPRAAHEILDHSV TGARES IAGMLD TT KGLIRASMRK 1092  
-----  
1093 GGLTSRV ITRLSNYDYEQ FRAGMV LLTGRKRNVLIDKES 1131  
-----  
1132 CSVQLARALR SHMWARLARGRP IYGLEVPDVL ESMRGHL 1170  
-----  
1171 IRRHETCV ICECGSVNYGW FFVPSGCQLDD IDKETSSLR 1209  
-----  
1210 VPYIGSTTDERTDMKLA FVRAPSR SLRS AVR IATVYSWA 1248  
-----  
1249 YGDDSSSWNEAWLLARQRANV SLEELRV ITP ISTSTNLA 1287  
-----  
1288 HRLRDRSTQVKYSGT SLVRVARYTT ISNDNLSFV ISDKK 1326  
-----  
1327 VDTNFIYQQGMLLGLGVLET LFRLEKDTGSSNTVLHLHV 1365  
-----  
1366 ETDCCVIPM IDHPRIPSSRKLELRAELCTNPLIYDNAPL 1404  
-----  
1405 IDRDTTRLYTQSHRRHLVEFVTWSTPQLYHILAKSTALS 1443  
12 -----A----- 12  
1444 MIDLVTKFEKDHMNEISALIGDDDINSFITEFLLIEPRL 1482  
-----

1483 FT IYLGQCAA INWAFDVHYHRP SGKYQMGELLSSFLSRM 1521  
13 -----F-- 13  
1522 SKGVFKVLVNALSHPK IYKKFWHCG IIEP IHGPSLDAQN 1560  
-----  
1561 LH TVCNM VYTCYMTY LDLLLNEELEEF TFLLCESDEDV 1599  
-----  
1600 VPDRFDN IQAKHL CVLADLYCQPGT CPP IRGLRPVEKCA 1638  
-----  
1639 VLTDH IKA EARLSPAGSSWN INP IIVDHYSCLTYLRRG 1677  
-----  
1678 SIKQ IRLRVDPGF IFDALAEVNV SQPK IGSNN ISNM SIK 1716  
-----  
1717 AFRPPHDDVAKLLKD INTSKHNL PISGGNLANYE IHA FR 1755  
14 D----- 14  
1756 RIGLNSSACYKAVE ISTLIRRCLEPGEDGLFLGEGSGSM 1794  
-----  
1795 LITYKEILKLNKCFYNSGV SANSR SGQRELAPYPSEVGL 1833  
-----  
1834 VEHRMGVGN IVKVLFN GRPEVTWVGSVDCPNF IVSN IPT 1872  
15 -----Y----- 15  
1873 SSVGFIHSD IETLPNKDT IEKLEELAA ILSMALLLGKIG 1911  
-----  
1912 SILV IKLMPFSGDFVQGFISYVGS HYREVN LVYPRYSNF 1950  
-----  
1951 ISTE SYLVM TDLKANRLMNPEK IKQQ IIESSVRTSPGLI 1989  
-----  
1990 GH ILSIKQLSCLQA IVGDAVSRGD INPTLKKLTP IEQVL 2028  
16 -----V----- 16  
2029 INCGLA INGPKLCKEL IHHDVASGQDGLLNS ILILYREL 2067  
-----  
2068 ARFKDNQR SQQGM FHAYPVLV SSRQREL ISR ITRKFWGH 2106  
-----  
2107 ILLYSGNRKL INKF IQNLKSGYL ILDLHQN IFVKNLSKS 2145  
-----  
2146 EKQ IIMTGGLKREWVFKVTVKETKEWYKLVGYSALIKD 2183  
-----



Table S1. Plasma levels of IL-1 $\beta$ , IFN- $\gamma$ , IL-12, IL-17, CCL2, CCL11, CCL22, CXCL9, CXCL11, MIF and  $\beta$ FGF of individual macaques, corresponding to Figure 6.

| CCL11 (pg/ml)<br>Day post-infection | WT MeV |      |     |     |      | LAMV |     |     |     |     |
|-------------------------------------|--------|------|-----|-----|------|------|-----|-----|-----|-----|
| 0                                   | 923    | 687  | 468 | 424 | 794  | 429  | 488 | 498 | 481 | 502 |
| 3                                   | 2128   | 1250 | 825 | 665 | 1041 |      |     |     |     |     |
| 7                                   | 1835   | 1793 | 752 | 243 | 1121 | 562  | 793 | 483 |     |     |
| 10                                  | 1804   | 2326 | 877 |     |      |      |     |     |     |     |
| 14                                  | 808    | 1145 | 474 | 387 | 550  | 613  | 586 | 509 | 139 | 179 |
| 24                                  | 1065   | 1172 | 527 | 300 | 1143 |      |     |     |     |     |
| 28                                  |        |      |     |     |      | 625  | 637 | 524 | 478 | 381 |

| $\beta$ FGF (pg/ml)<br>Day post-infection | WT MeV |      |      |      |       | LAMV |      |      |      |      |
|-------------------------------------------|--------|------|------|------|-------|------|------|------|------|------|
| 0                                         | 24.4   | 26.6 | 26.7 | 23.3 | 25    | 14.7 | 21.6 | 14.7 | 24.4 | 21.6 |
| 3                                         | 24.4   | 23.3 | 19.8 | 26.6 | 19.8  |      |      |      |      |      |
| 7                                         | 27.6   | 26.6 | 18.6 | 21   | 26.6  | 25.5 | 22.2 | 16   |      |      |
| 10                                        | 29.7   | 26.6 | 26.6 |      |       |      |      |      |      |      |
| 14                                        | 25.5   | 19.8 | 19.2 | 19.8 | 207.9 | 23.9 | 21   | 18.6 | 16   | 17.3 |
| 24                                        | 24.4   | 17.3 | 14.7 | 19.8 | 148.5 |      |      |      |      |      |
| 28                                        |        |      |      |      |       | 21.6 | 28.7 | 18.6 | 18.6 | 27.6 |

| IFN- $\gamma$ (pg/ml)<br>Day post-infection | WT MeV |      |       |      |      | LAMV |   |   |   |   |
|---------------------------------------------|--------|------|-------|------|------|------|---|---|---|---|
| 0                                           | 0      | 0    | 0     | 5    | 13.3 | 0    | 0 | 0 | 0 | 0 |
| 3                                           | 5      | 17   | 5     | 0    | 0    |      |   |   |   |   |
| 7                                           | 193    | 121  | 39.3  | 20.5 | 97.4 | 0    | 0 | 0 |   |   |
| 10                                          | 298    | 107  | 104.7 |      |      |      |   |   |   |   |
| 14                                          | 61.7   | 27   | 13.3  | 27.1 | 906  | 0    | 0 | 0 | 0 | 0 |
| 24                                          | 13.3   | 20.5 | 0     | 0    | 661  |      |   |   |   |   |
| 28                                          |        |      |       |      |      | 5    | 0 | 0 | 0 | 0 |

| IL-1 $\beta$ (pg/ml)<br>Day post-infection | WT MeV |      |      |      |      | LAMV |      |      |      |      |
|--------------------------------------------|--------|------|------|------|------|------|------|------|------|------|
| 0                                          | 54.5   | 49.5 | 47.4 | 47.9 | 55.4 | 38.7 | 44.9 | 40.7 | 48.7 | 47.2 |
| 3                                          | 66.5   | 62.3 | 50.7 | 48.2 | 48.2 |      |      |      |      |      |
| 7                                          | 66.7   | 64.4 | 44.6 | 28.3 | 50.9 | 52.3 | 54.1 | 38.6 | 34.8 | 36.7 |
| 10                                         | 73.5   | 67.5 | 56.7 |      |      |      |      |      |      |      |
| 14                                         | 62.6   | 56.3 | 42.1 | 44.4 | 67.5 | 44.2 | 46.9 | 37.8 | 46.3 | 44.3 |
| 24                                         | 52.5   | 58.4 | 42.7 | 47.3 | 72   |      |      |      |      |      |
| 28                                         |        |      |      |      |      | 54.7 | 49.4 | 39.9 | 43.2 | 46.3 |

| IL-12 (pg/ml)<br>Day post-infection | WT MeV |      |      |     |      | LAMV |     |     |     |      |
|-------------------------------------|--------|------|------|-----|------|------|-----|-----|-----|------|
| 0                                   | 1127   | 745  | 500  | 500 | 500  | 500  | 500 | 500 | 500 | 768  |
| 3                                   | 1998   | 1339 | 500  | 500 | 500  |      |     |     |     |      |
| 7                                   | 2820   | 1476 | 587  | 500 | 500  | 500  | 500 | 500 |     |      |
| 10                                  | 2963   | 1654 | 934  |     |      |      |     |     |     |      |
| 14                                  | 3925   | 500  | 1190 | 500 | 5031 | 500  | 500 | 500 | 500 | 500  |
| 24                                  | 2711   | 1127 | 500  | 500 | 3474 |      |     |     |     |      |
| 28                                  |        |      |      |     |      | 500  | 500 | 500 | 500 | 1127 |

| CXCL11 (pg/ml)<br>Day post-infection | WT MeV |      |      |     |      | LAMV |     |     |     |     |
|--------------------------------------|--------|------|------|-----|------|------|-----|-----|-----|-----|
| 0                                    | 756    | 1677 | 821  | 200 | 200  | 200  | 200 | 200 | 200 | 200 |
| 3                                    | 922    | 1783 | 1047 | 748 | 541  |      |     |     |     |     |
| 7                                    | 1698   | 3065 | 2978 | 756 | 2997 | 200  | 200 | 200 | 200 | 200 |
| 10                                   | 3875   | 2932 | 1452 |     |      |      |     |     |     |     |
| 14                                   | 200    | 284  | 390  | 530 | 632  | 200  | 200 | 200 | 200 | 200 |
| 24                                   | 432    | 979  | 235  | 200 | 882  |      |     |     |     |     |
| 28                                   |        |      |      |     |      | 200  | 200 | 200 | 200 | 200 |

| CCL2 (pg/ml)<br>Day post-infection | WT MeV |     |     |     |     | LAMV |     |     |     |     |
|------------------------------------|--------|-----|-----|-----|-----|------|-----|-----|-----|-----|
| 0                                  | 563    | 343 | 287 | 323 | 278 | 190  | 231 | 204 | 270 | 300 |
| 3                                  | 1083   | 453 | 547 | 402 | 467 |      |     |     |     |     |
| 7                                  | 1177   | 751 | 538 | 307 | 742 | 320  | 436 | 347 |     |     |
| 10                                 | 939    | 716 | 774 |     |     |      |     |     |     |     |
| 14                                 | 554    | 368 | 380 | 346 | 368 | 264  | 226 | 256 | 344 | 293 |
| 24                                 | 802    | 425 | 349 | 292 | 451 |      |     |     |     |     |
| 28                                 |        |     |     |     |     | 304  | 386 | 375 | 310 | 372 |

| CCL22 (pg/ml)<br>Day post-infection | WT MeV |      |     |    |    | LAMV |      |     |     |     |
|-------------------------------------|--------|------|-----|----|----|------|------|-----|-----|-----|
| 0                                   | 276    | 949  | 10  | 10 | 10 | 10   | 169  | 229 | 10  | 77  |
| 3                                   | 1034   | 1967 | 349 | 10 | 10 |      |      |     |     |     |
| 7                                   | 824    | 2206 | 57  | 10 | 10 | 10   | 987  | 229 |     |     |
| 10                                  | 554    | 528  | 10  |    |    |      |      |     |     |     |
| 14                                  | 501    | 790  | 15  | 10 | 10 | 10   | 1132 | 510 | 10  | 26  |
| 24                                  | 867    | 1468 | 202 | 10 | 10 |      |      |     |     |     |
| 28                                  |        |      |     |    |    | 10   | 936  | 398 | 202 | 253 |

| MIF (pg/ml)<br>Day post-infection | WT MeV |      |      |      |     | LAMV |      |      |     |     |
|-----------------------------------|--------|------|------|------|-----|------|------|------|-----|-----|
| 0                                 | 713    | 1618 | 1524 | 2374 | 605 | 173  | 764  | 717  | 567 | 481 |
| 3                                 | 2079   | 1787 | 3913 | 411  | 280 |      |      |      |     |     |
| 7                                 | 4588   | 298  | 714  | 133  | 642 | 4247 | 270  | 1256 |     |     |
| 10                                | 1862   | 466  | 716  |      |     |      |      |      |     |     |
| 14                                | 704    | 232  | 1317 | 388  | 454 | 278  | 185  | 374  | 142 | 196 |
| 24                                | 1842   | 409  | 784  | 403  | 104 |      |      |      |     |     |
| 28                                |        |      |      |      |     | 1487 | 2025 | 546  | 275 | 698 |

| IL-17 (pg/ml)<br>Day post-infection | WT MeV |      |      |       |      | LAMV  |      |      |      |       |
|-------------------------------------|--------|------|------|-------|------|-------|------|------|------|-------|
| 0                                   | 144    | 96   | 42.3 | 28.5  | 1    | 80.6  | 33.3 | 16.8 | 70.6 | 145   |
| 3                                   | 42     | 64.5 | 38.3 | 110.9 | 1.9  |       |      |      |      |       |
| 7                                   | 54     | 82   | 21.8 | 93.6  | 1    | 66.2  | 2    | 37.7 | 44.7 | 106.5 |
| 10                                  | 34     | 1    | 21.6 |       |      |       |      |      |      |       |
| 14                                  | 10     | 1    | 19.2 | 1     | 19.7 | 62.1  | 32.5 | 38.8 | 30.1 | 163.4 |
| 24                                  | 59     | 1    | 44.1 | 9.8   | 17.9 |       |      |      |      |       |
| 28                                  |        |      |      |       |      | 166.6 | 8.9  | 51.8 | 17.2 | 180.6 |

| CXCL9 (pg/ml)<br>Day post-infection | WT MeV |     |     |     |     | LAMV |     |    |     |     |
|-------------------------------------|--------|-----|-----|-----|-----|------|-----|----|-----|-----|
| 0                                   | 138    | 176 | 122 | 138 | 164 | 50   | 75  | 75 | 90  | 75  |
| 3                                   | 164    | 196 | 176 | 176 | 164 |      |     |    |     |     |
| 7                                   | 238    | 295 | 246 | 176 | 343 | 103  | 122 | 50 |     |     |
| 10                                  | 573    | 590 | 635 |     |     |      |     |    |     |     |
| 14                                  | 246    | 186 | 152 | 230 | 186 | 50   | 103 | 75 | 75  | 122 |
| 24                                  | 176    | 186 | 138 | 164 | 253 |      |     |    |     |     |
| 28                                  |        |     |     |     |     | 138  | 75  | 75 | 122 | 138 |

Table S2. MeV-specific IgG of individual macaques measured by enzyme immunoassays (EIAs), corresponding to Figure 7a.

| Day post infection | WT   |     |     |      |     |     |     |     | LAMV |     |     |     |     |     |
|--------------------|------|-----|-----|------|-----|-----|-----|-----|------|-----|-----|-----|-----|-----|
| 0                  | 0.0  | 0.0 | 0.0 | 0.0  | 1.0 | 0.0 | 0.0 | 1.0 | 1.0  | 1.0 | 1.0 | 1.4 | 2.0 | 1.0 |
| 14                 | 6.0  |     | 3.5 |      | 5.0 | 6.0 | 5.0 | 7.0 | 8.5  | 4.0 | 5.0 | 5.5 | 5.0 | 4.5 |
| 24                 | 8.0  | 6.5 | 8.5 | 8.5  | 7.0 | 8.0 | 7.5 | 8.5 |      |     |     |     |     |     |
| 28                 |      |     |     |      |     |     |     |     | 7.5  | 5.5 | 7.0 | 7.0 | 5.0 | 6.0 |
| 35                 | 9.0  | 7.5 | 9.0 | 8.5  |     | 8.0 | 8.5 | 8.5 |      |     |     |     |     |     |
| 42                 |      |     |     |      |     |     |     |     | 7.5  | 5.0 | 6.0 | 7.0 | 5.0 | 6.5 |
| 50                 |      | 8.0 | 9.0 | 9.0  | 9.5 | 8.0 | 7.5 |     |      |     |     |     |     |     |
| 56                 |      |     |     |      |     |     |     |     | 8.0  | 4.5 | 6.0 | 6.5 | 5.0 | 7.0 |
| 69                 |      | 8.0 | 9.0 | 10.5 |     | 8.0 | 8.0 | 9.0 | 9.0  | 4.5 | 6.0 | 6.0 | 5.0 | 8.0 |
| 83                 | 10.0 | 8.0 | 9.0 | 10.5 | 9.5 |     |     | 9.0 | 8.0  | 5.0 | 6.0 | 6.0 | 5.0 | 7.5 |

Table S3. H-specific IgG of individual macaques measured by enzyme immunoassays (EIAs), corresponding to Figure 7c.

| Day post infection | WT   |      |      |     |     |      | LAMV |     |     |     |     |      |
|--------------------|------|------|------|-----|-----|------|------|-----|-----|-----|-----|------|
|                    |      |      |      |     |     |      |      |     |     |     |     |      |
| 0                  | 0    | 0.67 | 0.76 | 0   | 0   | 1.76 | 0    | 0   | 0   | 0   | 0   | 0.75 |
| 7                  | 0    | 0    | 0    | 0   | 0   | 2.65 |      |     |     |     |     |      |
| 10                 | 0    | 0    | 0    |     | 0   | 3.6  |      |     |     |     |     |      |
| 14                 | 4    | 5.74 | 5.69 | 5   | 2   | 3.6  | 1.6  | 0   | 3   | 0   | 0   | 0.75 |
| 17                 | 4.5  | 6.32 | 7.53 | 8.7 | 5   | 4.5  |      |     |     |     |     |      |
| 24                 | 6    | 6.94 | 9    | 9.3 | 5.8 |      | 4.5  | 3   | 6   | 3.9 | 3   | 4    |
| 35                 | 7.54 | 7.12 | 8.86 | 8.7 | 6   |      |      |     |     |     |     |      |
| 50                 | 7.84 | 7.4  | 9    | 9   | 7.7 | 7.3  | 6.44 | 3.5 | 5.8 | 5.3 | 2.6 | 5    |
